# Supplementary material for: β-catenin-mediated YAP signaling promotes human glioma growth
Source: PubMed Central journal article supplement (PMC5622484; doi:10.1186/s13046-017-0606-1), 2017-09-29
Supplement: 13046_2017_606_MOESM3_ESM.pdf [file 13046_2017_606_MOESM3_ESM.pdf]

### Additional file 3

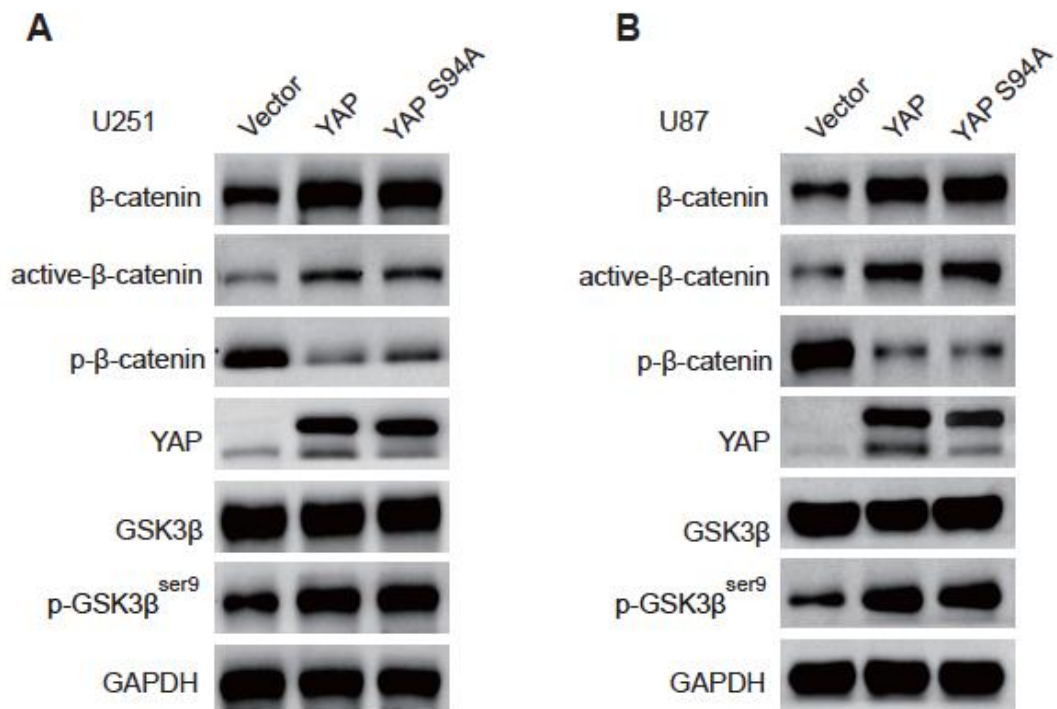

**sFig.3 The effect of YAP on GSK-3β and β-catenin phosphorylation.** (A&B) Representative immunoblots of GSK-3β, p-GSK-3β, β-catenin, active-β-catenin and p-β-catenin after over-expression of YAP or YAP S94A in U251 (A) and U87 (B) glioma cells. The results indicate that YAP S94A recapitulated the effect of YAP wild type on GSK3β and β-catenin phosphorylation
