# Supplementary material for: β-catenin-mediated YAP signaling promotes human glioma growth
Source: Springer Nature journal article supplement (doi:10.1186/s13046-017-0606-1), 2017-09-29
Supplement: MOESM2 [file 15095022]

## Additional file 2

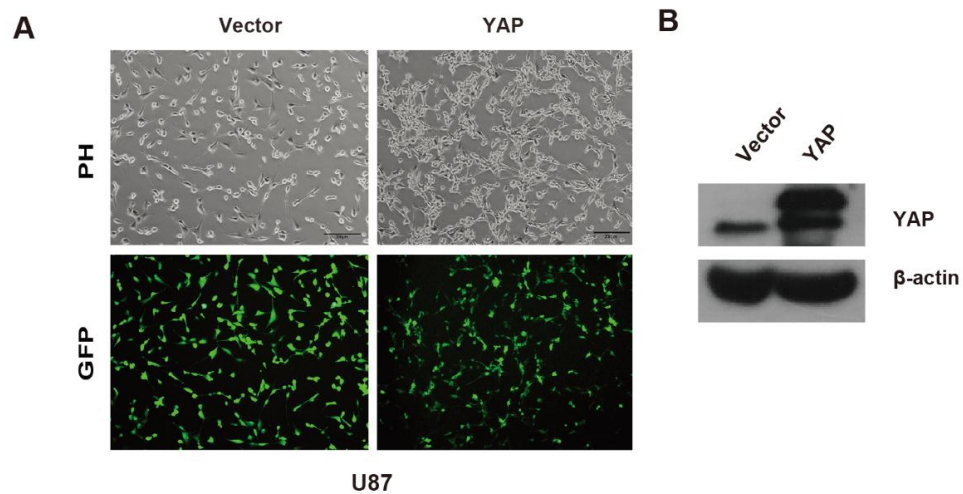

**sFig.2 Generation of YAP over-expression U87 cells.** (A) The infection efficiency of vector and YAP lentivirus in U87 cells. U87 glioma cells were infected with viral supernatant and the infection efficacy was evaluated by GFP positive cells 72 hours later. Scale bar, 100  $\mu\text{m}$ . PH: Phase contrast. (B) Expression analysis of YAP protein levels by Western blotting in YAP over-expression U87 glioma cells.
